# Supplementary material for: Computational analysis of R–X oxidative addition to Pd nanoparticles
Source: Chem Sci. 2024 May 24;15(26):9977–86. doi: 10.1039/d4sc00628c (PMC11220582; doi:10.1039/d4sc00628c)
Supplement: SC-015-D4SC00628C-s002 [file SC-015-D4SC00628C-s002.xlsx]

## Sheet: Sheet1
System	State	E (revPBE-D3BJ) [eV]	Thermo SPH GFN1 [Ha]	E (GFN1) [Ha]	E (GFN1-GBSA) [Ha]	G [Ha]					in kcal/mol
Pd55 ed	1'	-329.988	-0.054302	-265.897	-265.914	-12.1952		System	1 -> 1'	1' -> TS1	1' -> 2	1 -> 2	2 -> 3	1' -> 3
Pd55 ver	1'	-330.209	-0.05381	-265.892	-265.91	-12.2038		Pd55 ed		7.50358	-6.01743
Pd79 fac-ed	1'	-454.725	-0.100345	-373.823	-373.846	-16.8307		Pd55 ver		9.20305	-18.0048
Pd79 ed-ed	1'	-454.802	-0.10021	-373.824	-373.846	-16.8332		Pd79 ed-ed	-49.6821	6.0081	-3.76949	-53.4516	-7.05671	-10.8262
Pd79 fac	1'	-454.688	-0.100976	-373.821	-373.842	-16.8287		Pd79 fac-ed	-48.1176	11.4336	1.88269	-46.2349	-14.2734	-12.3908
Pd140 ed	1'	-775.211	-0.192764	-648.245	-648.275	-28.7082		Pd79 fac	-46.8962	13.399	3.20051	-43.6957	-16.8126	-13.6121
NEt3	1'	-312.81	0.435341	-71.6402	-71.6385	-11.0555		Pd140 ed		3.86498	-9.7395
PMe3	1'	-210.944	0.253759	-51.405	-51.4081	-7.49839		NEt3	-12.0485	9.68684	-20.8475	-32.896
PPh3	1'	-520.151	0.539146	-121.211	-121.22	-18.5822		PMe3	5.03624	7.6087	-32.0729	-27.0366
								PPh3	-1.86461	11.5317	-25.38	-27.2446
Pd55 ed	TS1	-329.75	-0.050997	-265.88	-265.897	-12.1833
Pd55 ver	TS1	-329.855	-0.052852	-265.886	-265.903	-12.1892
Pd79 fac-ed	TS1	-454.304	-0.098585	-373.799	-373.82	-16.8124
Pd79 ed-ed	TS1	-454.592	-0.099851	-373.807	-373.828	-16.8236
Pd79 fac	TS1	-454.161	-0.099562	-373.79	-373.811	-16.8074
Pd140 ed	TS1	-775.075	-0.192001	-648.233	-648.263	-28.7021
NEt3	TS1	-312.133	0.430622	-71.6254	-71.6284	-11.04
PMe3	TS1	-210.662	0.254398	-51.3934	-51.3954	-7.48626
PPh3	TS1	-519.704	0.540897	-121.194	-121.203	-18.5639
Pd55 ed	2	-330.201	-0.054273	-265.909	-265.928	-12.2048
Pd55 ver	2	-331.008	-0.053523	-265.906	-265.923	-12.2325
Pd79 fac-ed	2	-454.612	-0.100888	-373.853	-373.876	-16.8277
Pd79 ed-ed	2	-454.947	-0.100992	-373.845	-373.867	-16.8392
Pd79 fac	2	-454.56	-0.101651	-373.815	-373.836	-16.8236
Pd140 ed	2	-775.668	-0.192391	-648.244	-648.273	-28.7237
NEt3	2	-313.669	0.436888	-71.6446	-71.6461	-11.0887
PMe3	2	-212.363	0.258289	-51.4095	-51.4161	-7.5495
PPh3	2	-521.257	0.542951	-121.213	-121.226	-18.6227
Pd79 (1 0 0)	3	-455.258	-0.100012	-373.872	-373.895	-16.8504
NEt3	1	-238.487	0.355528	-52.3811	-52.3784	-8.40297
Pd79	1	-378.951	-0.177108	-354.63	-354.65	-14.1207
PhBr	1	-73.2362	0.057154	-19.2382	-19.2403	-2.63331
PMe3	1	-137.464	0.176376	-32.1468	-32.1476	-4.87311
PPh3	1	-446.307	0.461001	-101.949	-101.958	-15.946
